# Supplementary material for: Risk and rates of hospitalisation in young children: a prospective study of a South African birth cohort
Source: bioRxiv or medRxiv preprint supplement (doi:10.1101/2023.06.08.23289961), 2023-06-12
Supplement: Supplementary file [file media-1.pdf]

## **Supplementary Information**

### **Risk and rates of hospitalisation in young children: a prospective study of a South African birth cohort**

Catherine J Wedderburn, Julia Bondar, Marilyn T Lake,

Raymond Nhapi, Whitney Barnett, Mark P Nicol, Liz Goddard, Heather J Zar

#### **This PDF file includes:**

**Supplementary Figure 1:** DAG model

**Supplementary Figure 2.** Causes of hospitalisation stratified by HIV exposure and age groups

**Supplementary Table 1:** Incidence of hospitalisations in the first 2 years of life stratified by age

**Supplementary Table 2:** Proportion of LRTI and RSV-LRTI hospitalisations by age category

**Supplementary Table 3:** Incidence of hospitalisations in the first 2 years of life by HIV exposure status excluding recurrent events

**Supplementary Table 4:** Incidence of hospitalisations in the first 2 years of life by HIV exposure status

**Supplementary Table 5:** Impact of birth, breastfeeding, and HIV-related factors on hospitalisation, stratified by HIV status and age

**Supplementary Table 6:** Association between malnutrition and hospitalisation



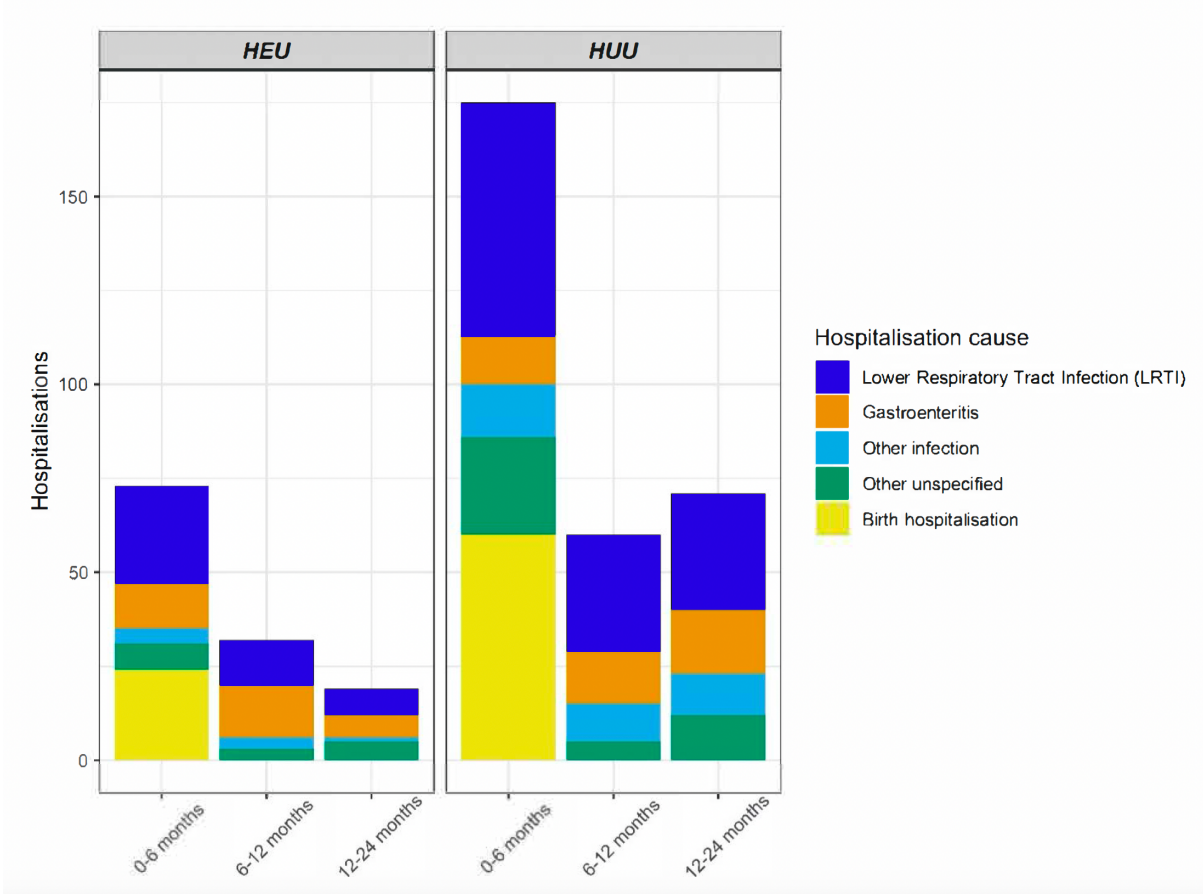

**Supplementary Figure 2.** Causes of hospitalisation stratified by HIV exposure and age groups  
 Other infections include: meningitis, sepsis, otitis media, urinary tract infection. Other unspecified causes include: Accident and trauma, burns, seizures, nutritional issues (failure to thrive, protein energy malnutrition, micronutrient deficiencies including anaemia)

**Supplementary Table 1:** Incidence of hospitalisation in the first 2 years of life stratified by age

|                             | <b>IR / 1000 person years<br/>(95% CI)</b> | <b>IRR (95% CI)</b>                               |
|-----------------------------|--------------------------------------------|---------------------------------------------------|
| <i>All hospitalisations</i> |                                            |                                                   |
| 0-12 months                 | 314 (281-349)                              | <u>0-12 v 12-24 months:</u><br>3.81 (2.99-4.85) * |
| 0-6 months                  | 454 (399-514)                              | <u>0-6 v 6-12 months:</u><br>2.69 (2.11-3.44) *   |
| 6-12 months                 | 168 (135-207)                              | <u>6-12 v 12-24 months:</u><br>2.04 (1.51-2.76) * |
| 12-24 months                | 82 (65-102)                                | <u>0-6 v 12-24 months:</u><br>5.51 (4.30-7.70) *  |

*Footnote:* IR = Incidence rate; IRR = Incidence rate ratio; HR = Hazard ratio. \*p-value < 0.001

**Supplementary Table 2:** Proportion of LRTI and RSV-LRTI hospitalisations by age category

| <b>Age category</b> | <b>LRTI hospitalizations<br/>(n; % of total LRTI<br/>hospitalisations<br/>[n=169])</b> | <b>RS -LRTI<br/>(n; % of total RSV<br/>hospitalisations<br/>[n=53])</b> | <b>LRTI hospitalisations<br/>(n; % of hospitalisations per<br/>age group)</b> | <b>RSV-LRTI<br/>(n; % of hospitalisations per<br/>age group)</b> |
|---------------------|----------------------------------------------------------------------------------------|-------------------------------------------------------------------------|-------------------------------------------------------------------------------|------------------------------------------------------------------|
| <b>0-12 months</b>  | 131/169 (78%)                                                                          | 46/53 (87%)                                                             | 131/256 (51%)                                                                 | 46/256 (18%)                                                     |
| <b>0-6 months</b>   | 88/169 (52%)                                                                           | 36/53 (68%)                                                             | 88/164 (54%)                                                                  | 36/164 (22%)                                                     |
| <b>6-12 months</b>  | 43/169 (25%)                                                                           | 10/53 (19%)                                                             | 43/92 (47%)                                                                   | 10/92 (11%)                                                      |
| <b>12-24 months</b> | 38/169 (22%)                                                                           | 7/53 (13%)                                                              | 38/90 (42%)                                                                   | 7/90 (8%)                                                        |

*Footnote:* Numbers exclude birth hospitalisations. Abbreviations: LRTI: Lower respiratory tract infection; RSV: Respiratory syncytial virus

**Supplementary Table 3:** Incidence of hospitalisations in the first 2 years of life by HIV exposure status excluding recurrent events

|                             | <b>HEU<br/>IR / 1000 person<br/>years</b> | <b>HUU<br/>IR /1000<br/>person years</b> | <b>IRR (95% CI)</b> |
|-----------------------------|-------------------------------------------|------------------------------------------|---------------------|
| <i>All hospitalisations</i> |                                           |                                          |                     |
| 0-12 months                 | 334 (262-418)                             | 223 (192-258)                            | 1.49 (1.14-1.95) ** |
| 0-6 months                  | 510 (388-658)                             | 349 (295-410)                            | 1.46 (1.08-1.97) *  |
| 6-12 months                 | 144 (82-234)                              | 89 (62-123)                              | 1.62 (0.90-2.92)    |
| 12-24 months                | 50 (25-90)                                | 45 (31-62)                               | 1.12 (0.57-2.20)    |

*Footnote:* \*\* p-value < 0.01; \* p-value < 0.05. Abbreviations: HEU = HIV-exposed uninfected; HUU = HIV-unexposed uninfected; IR = Incidence rate; IRR = Incidence rate ratio

**Supplementary Table 4:** Incidence of hospitalisations in the first 2 years of life by HIV exposure status

|              | <b>All</b>              | <b>HEU</b>              | <b>HUU</b>              | <i>Unadjusted</i>    | <i>Adjusted model 1</i> | <i>Adjusted model 2</i> |
|--------------|-------------------------|-------------------------|-------------------------|----------------------|-------------------------|-------------------------|
|              | <b>IR / 1000 person</b> | <b>IR / 1000 person</b> | <b>IR / 1000 person</b> | <b>IRR (95% CI)</b>  | <b>HR (95% CI)</b>      | <b>HR (95% CI)</b>      |
|              | <b>years</b>            | <b>years</b>            | <b>years</b>            |                      |                         |                         |
| 0-12 months  | 235 (207-266)           | 346 (274-431)           | 205 (175-238)           | 1.69 (1.30-2.21) *** | 1.53 (1.14-2.07) **     | 1.59 (1.16-2.18) **     |
| 0-6 months   | 299 (255-349)           | 424 (314-559)           | 265 (219-319)           | 1.60 (1.14-2.23) **  | 1.48 (1.03-2.12) *      | 1.56 (1.07-2.28) *      |
| 6-12 months  | 168 (135-207)           | 265 (179-379)           | 142 (107-183)           | 1.87 (1.20-2.91) **  | 1.73 (1.05-2.85) *      | 1.76 (1.00-3.08) *      |
| 12-24 months | 82 (65-102)             | 77 (45-124)             | 84 (65-106)             | 0.92 (0.54-1.57)     | 0.91 (0.53-1.55)        | 0.78 (0.44-1.38)        |

*Footnote:* Unadjusted incident rate ratios and adjusted hazard models for hospitalisations in the first 2 years of life by HIV exposure excluding birth hospitalisations.

IR = Incidence rate; IRR = Incidence rate ratio; HR = Hazard ratio. Multivariate models adjusted for (1) maternal education and household income; (2) maternal education, household income, maternal age at birth and maternal smoking. \*\*\* p-value < 0.001; \*\* p-value < 0.01; \* p-value < 0.05

Abbreviations: HR = Hazard ratio; HEU = HIV-exposed uninfected; HUU = HIV-unexposed uninfected; IR = Incidence rate; IRR = Incidence rate ratio; OR = Odds ratio.

**Supplementary Table 5:** Impact of birth, breastfeeding and HIV-related factors on hospitalisations stratified by HIV status and age

|                                                                   |             | HEU<br>HR (95% CI)   | HUU<br>HR (95% CI)   | Total<br>HR (95% CI) |
|-------------------------------------------------------------------|-------------|----------------------|----------------------|----------------------|
| <b><i>Birth factors</i></b>                                       |             |                      |                      |                      |
| <b><i>Prematurity</i></b>                                         |             |                      |                      |                      |
| 0-12 months                                                       |             | 1.94 (1.11-3.37) *   | 1.75 (1.22-2.52) **  | 1.85 (1.36-2.52) *** |
|                                                                   | 0-6 months  | 1.67 (0.89-3.13)     | 2.04 (1.34-3.11) *** | 1.95 (1.37-2.78) *** |
|                                                                   | 6-12 months | 2.66 (1.07-6.62) *   | 1.26 (0.66-2.41)     | 1.74 (0.99-3.04)     |
| 12-24 months                                                      |             | 1.48 (0.43-5.11)     | 0.97 (0.45-2.06)     | 1.07 (0.56-2.04)     |
| <b><i>Feeding</i></b>                                             |             |                      |                      |                      |
| <b><i>Ever breastfed</i></b>                                      |             |                      |                      |                      |
| 0-12 months                                                       |             | 0.85 (0.51-1.43)     | 0.76 (0.42-1.39)     | 0.63 (0.46-0.87) **  |
| 12-24 months                                                      |             | 1.00 (0.39-2.62)     | 1.07 (0.35-3.22)     | 1.08 (0.60-1.94)     |
| <b><i>Breastfeeding for a year</i></b>                            |             |                      |                      |                      |
| 0-12 months                                                       |             | 1.02 (0.39-2.62)     | 0.71 (0.50-1.02)     | 0.67 (0.48 -0.93) *  |
| 12-24 months                                                      |             | 0.97 (0.24-3.88)     | 0.64 (0.36-1.11)     | 0.70 (0.42 -1.16)    |
| <b><i>Immunization timing by 9 months</i></b>                     |             |                      |                      |                      |
| 0-12 months                                                       |             | 1.48 (0.87-2.52)     | 1.36 (0.96-1.92)     | 1.39 (1.04-1.87) *   |
| 12-24 months                                                      |             | 1.34 (0.52-3.48)     | 1.03 (0.60-1.77)     | 1.09 (0.68-1.75)     |
| <b><i>HIV-related variables</i></b>                               |             |                      |                      |                      |
| <b><i>CD4 - categorical (&gt;500 vs ≤500)</i></b>                 |             |                      |                      |                      |
| 0-12 months                                                       |             | 0.99 (0.56-1.76)     | -                    | -                    |
|                                                                   | 0-6 months  | 0.92 (0.46-1.87)     | -                    | -                    |
|                                                                   | 6-12 months | 1.11 (0.43-2.83)     | -                    | -                    |
| 12-24 months                                                      |             | 0.88 (0.33-2.35)     | -                    | -                    |
| <b><i>Viral load-categorical (≥40 vs &lt;40)</i></b>              |             |                      |                      |                      |
| 0-12 months                                                       |             | 1.51 (0.79-2.86)     | -                    | -                    |
|                                                                   | 0-6 months  | 0.92 (0.43-1.98)     | -                    | -                    |
|                                                                   | 6-12 months | 4.43 (1.52-12.87) ** | -                    | -                    |
| 12-24 months                                                      |             | 1.31 (0.40-4.30)     | -                    | -                    |
| <b><i>ART regimen initiation (Before vs during pregnancy)</i></b> |             |                      |                      |                      |
| 0-12 months                                                       |             | 0.86 (0.51-1.44)     | -                    | -                    |
|                                                                   | 0-6 months  | 1.06 (0.58-1.93)     | -                    | -                    |
|                                                                   | 6-12 months | 0.54 (0.20-1.40)     | -                    | -                    |
| 12-24 months                                                      |             | 0.76 (0.29-1.99)     | -                    | -                    |

*Footnote:* Results with birth hospitalisations excluded. \*\*\* p-value < 0.001; \*\* p-value < 0.01; \* p-value < 0.05 for unadjusted models. Definitions: Prematurity (<37 vs ≥ 37 weeks); Ever breastfeeding (>0 months vs = 0 months); Breastfeeding for a year (>11 months vs ≤ 11 months). Abbreviations: ART = antiretroviral therapy; HR = Hazard ratio; HEU = HIV-exposed uninfected; HUU = HIV-unexposed uninfected



**Supplementary Table 6: Association between malnutrition and hospitalisation**

|              | <b>Underweight</b> |            |            |                    |
|--------------|--------------------|------------|------------|--------------------|
|              | <b>Total</b>       | <b>HEU</b> | <b>HUU</b> | <b>OR (95% CI)</b> |
| 0-12 months  | 47 (19%)           | 19 (24%)   | 28 (17%)   | 1.62 (0.83-3.12)   |
| 0-6 months   | 35 (22%)           | 14 (29%)   | 21 (19%)   | 1.76 (0.80-3.85)   |
| 6-12 months  | 12 (14%)           | 5 (17%)    | 7 (12%)    | 1.46 (0.40-5.03)   |
| 12-24 months | 9 (11%)            | 4 (25%)    | 5 (7.6%)   | 4.07 (0.90-17.69)  |
|              | <b>Stunted</b>     |            |            |                    |
| 0-12 months  | 71 (31%)           | 27 (38%)   | 44 (28%)   | 1.63 (0.90-2.94)   |
| 0-6 months   | 47 (32%)           | 16 (38%)   | 31 (30%)   | 1.45 (0.68-3.06)   |
| 6-12 months  | 24 (28%)           | 11 (38%)   | 13 (23%)   | 2.07 (0.78-5.51)   |
| 12-24 months | 14 (18%)           | 4 (27%)    | 10 (16%)   | 2.41 (0.65-8.32)   |
|              | <b>Wasted</b>      |            |            |                    |
| 0-12 months  | 29 (15%)           | 11 (19%)   | 18 (14%)   | 1.50 (0.64-3.37)   |
| 0-6 months   | 18 (17%)           | 8 (28%)    | 10 (13%)   | 2.51 (0.86-7.22)   |
| 6-12 months  | 11 (13%)           | 3 (10%)    | 8 (14%)    | 0.71 (0.15-2.68)   |
| 12-24 months | 8 (10%)            | 3 (20%)    | 5 (7.9%)   | 2.90 (0.54-13.55)  |

Abbreviations: HEU = HIV-exposed uninfected; HUU = HIV-unexposed uninfected; OR = Odds ratio
